# Supplementary material for: Encapsulating and inkjet-printing flexible conductive patterns on a fluoroelastomer for harsh hydrocarbon fluid environments
Source: Royal Society of Chemistry journal article supplement (doi:10.1039/d2tc04218e), 2023-01-01
Supplement: d2tc04218e1.pdf [file d2tc04218e1.pdf]

Supplementary information

**ENCAPSULATING AND INKJET-PRINTING FLEXIBLE CONDUCTIVE PATTERNS  
ON FLUOROELASTOMER FOR HARSH HYDROCARBON FLUID ENVIRONMENT**

Sahil P. Wankhede

Department of Mechanical Engineering, University of Massachusetts Amherst, MA 01003,  
U.S.A

Center for Personalized Health Monitoring, (CPHM), Institute for Applied Life Sciences (IALS),  
MA 01003, U.S.A

[swankhede@umass.edu](mailto:swankhede@umass.edu)

Ali H. Alshehri

Saudi Arabian Oil Company (Saudi Aramco), Dhahran 31311, Saudi Arabia  
[ali.alshehri@aramco.com](mailto:ali.alshehri@aramco.com)

Xian Du\*

Department of Mechanical Engineering, University of Massachusetts Amherst, MA 01003,  
U.S.A

Center for Personalized Health Monitoring, (CPHM), Institute for Applied Life Sciences (IALS),  
MA 01003, U.S.A

[xiandu@umass.edu](mailto:xiandu@umass.edu)

## S1. Fabrication process

A 2.0-inch x 2.0-inch (50.8 mm x 50.8 mm) FKM sheet was used as a substrate for inkjet printing. Figure 1 illustrates the fabrication process flow.

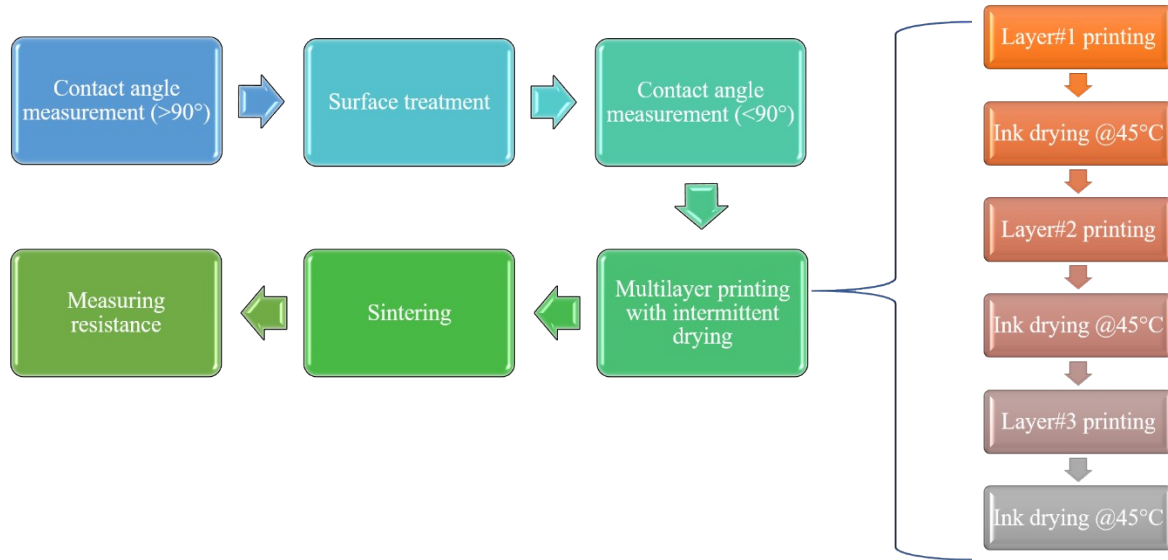

Figure 1. Fabrication process flow.

The contact angle of DI (de-ionized) water on the substrate was measured using a goniometer (ramé-hart instrument co. USA). Since this surface was hydrophobic, with contact angles  $>90^\circ$ , we treated the substrate with a corona treatment using a laboratory air corona treater BD-20AC (Electro-Technic Products, Inc, USA) with treatment parameters listed in Table 1.

Table 1. Corona treatment parameters.

| Lab corona treater  |                  |
|---------------------|------------------|
| Operating Parameter | Range            |
| Output Voltage      | 10000 to 48000 V |
| Frequency           | 4 to 5 MHz       |
| Input Voltage       | 115V,50/60Hz     |
| Current             | 0.35 A           |
| Power               | 40.25 W          |

|                                                         |                    |
|---------------------------------------------------------|--------------------|
| Operating Duration                                      | Continuous         |
| Distance between Electrode and Surface of the substrate | 1/8 in. to 1/4 in. |
| Treatment Time                                          | 8 mins             |

The contact angle was measured again after the surface treatment to ensure it is  $<90^\circ$ . Figure 2 shows the corona treatment of the FKM surface and a change of contact angle after the conversion from hydrophobic to hydrophilic surface.

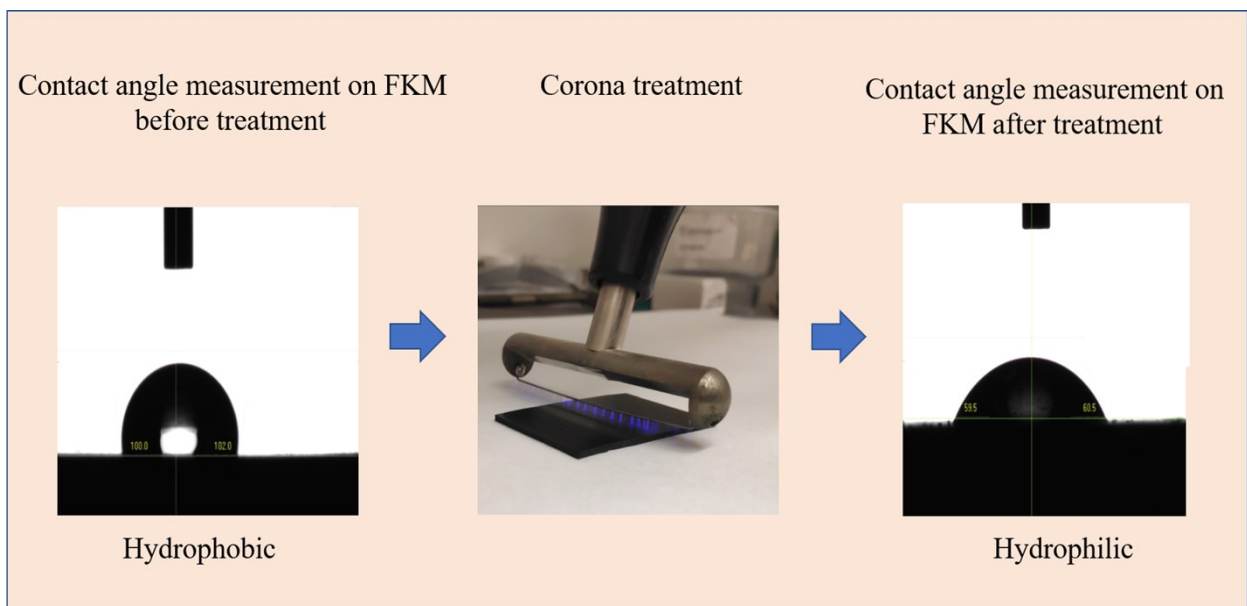

Figure 2. Contact angle measurement on FKM before and after corona treatment.

We optimized the printing process by printing multiple layers with intermittent drying. In this process, we printed the first layer of the ink and allowed it to dry on the printer stage before printing the second layer and so on. For our sample, we printed three layers with intermittent drying at  $45^\circ\text{C}$ . After printing three layers we started sintering at  $150^\circ\text{C}$  for 90 mins.

## S2. Neutral axis calculations

| Material | Thickness (μm) |
|----------|----------------|
| Ag       | 1.000          |
| FKM      | 1587.5         |

| Material | E (GPa) | Poisson | E plane   |
|----------|---------|---------|-----------|
| Ag       | 83      | 0.365   | 130.70866 |
| FKM      | 0.0069  | 0.5     | 0.0117211 |

Y1 = 793.75; Y2=1588.04; Y3= 2382.34; n2= 9478.84; n3= 1

$\bar{y}$  = 1588.05 μm = 1.59 mm, slightly greater than the thickness of substrate (FKM).

S3. Cross-sectional structures using fluoroelastomer as an encapsulant.

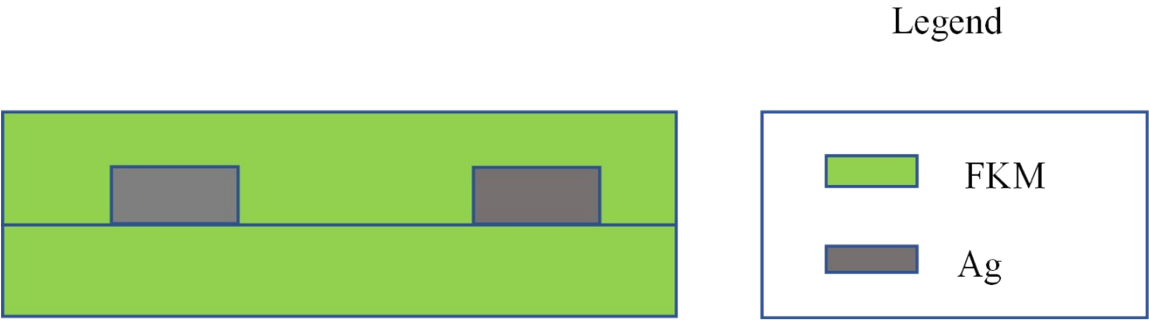

Figure 3. Silver pattern printed on/and encapsulated with FKM.

S4. Thickness of the printed pattern in the encapsulated samples after the test

| Sample | Average thickness ( $\mu\text{m}$ ) |
|--------|-------------------------------------|
| 1      | 0.989                               |
| 2      | 1.136                               |
| 3      | 0.979                               |
| 4      | 0.938                               |
| 5      | 1.04                                |

S5. FKM, PDMS, and PET weight study.

| % Weight change of the substrate in oil at 150 C |      |                       |      |
|--------------------------------------------------|------|-----------------------|------|
| Week                                             | FKM  | PDMS                  | PET  |
| 1                                                | 1    | 4.05                  | 12.5 |
| 2                                                | 1    | 5.45                  | 16.7 |
| 3                                                | 1.66 | weight study stopped. |      |
| 4                                                | 1.66 |                       |      |
| 5                                                | 1.66 |                       |      |
| 6                                                | 1.66 |                       |      |
| 7                                                | 1.66 |                       |      |
| 8                                                | 1.66 |                       |      |
| 9                                                | 1.66 |                       |      |
| 10                                               | 1.66 |                       |      |
| 11                                               | 1.66 |                       |      |
| 12                                               | 1.66 |                       |      |
| 13                                               | 1.66 |                       |      |
| 14                                               | 1.66 |                       |      |
| 15                                               | 1.66 |                       |      |
| 16                                               | 2    |                       |      |
| 17                                               | 2.23 |                       |      |
| 18                                               | 2.51 |                       |      |
| 19                                               | 2.66 |                       |      |
| 20                                               | 2.66 |                       |      |
